# Supplementary material
Source: PubMed Central journal article supplement (PMC8475521)
Supplement: jvi.01164-21-s0001.pdf [file jvi.01164-21-s0001.pdf]

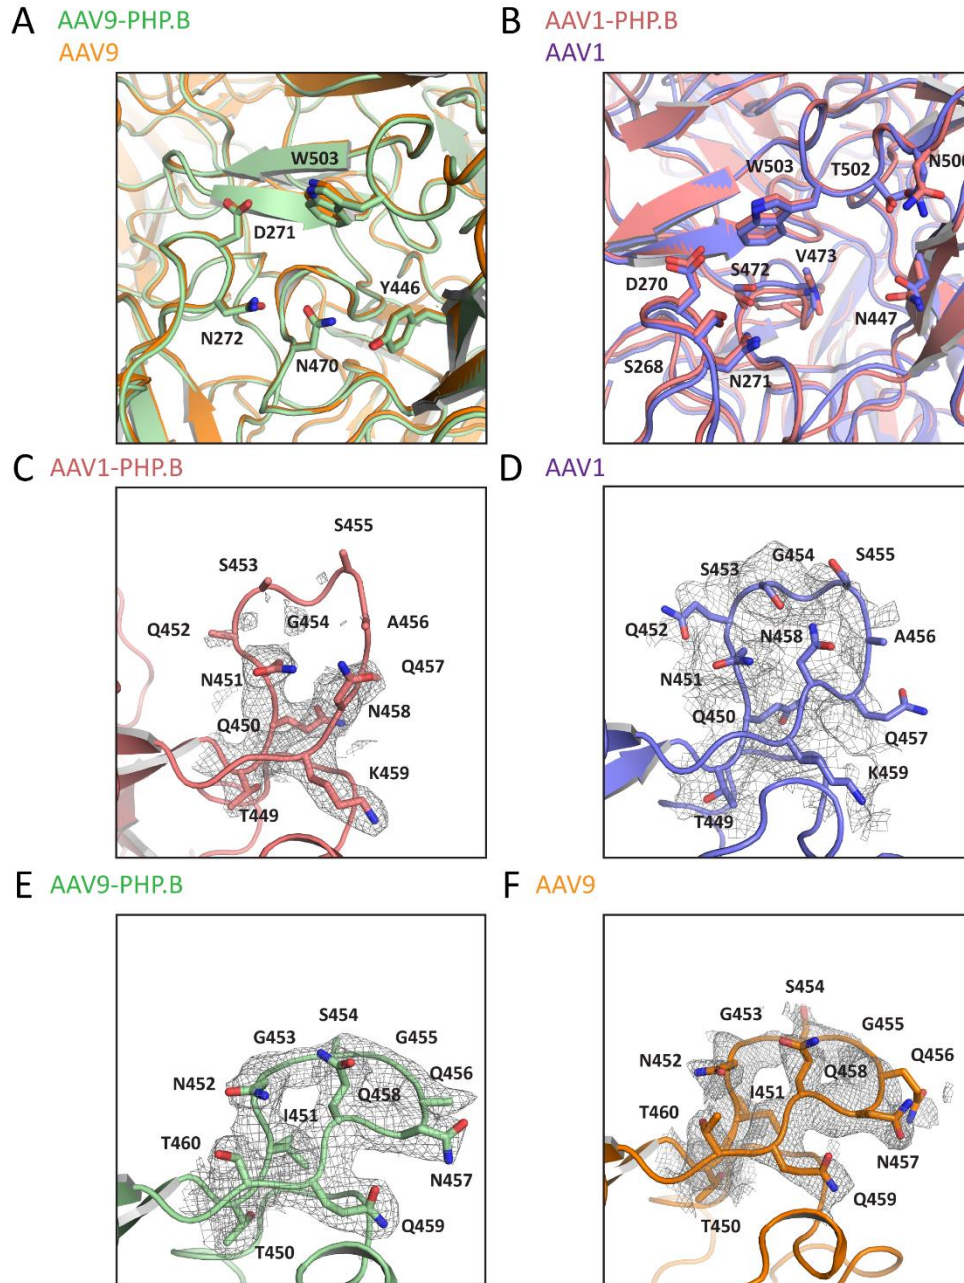

15 **Supplemental Figure 1. Insertion of the PHP.B peptide does not alter glycan binding**  
 16 **structures in the AAV capsid backbone but may induce changes in the adjacent HVRIV.**  
 17 (A) Overlay of AAV9-PHP.B (green) and AAV9 (orange) structures at AAV9's galactose-  
 18 binding site. (B) Overlay of AAV1-PHP.B (salmon) and AAV1 (purple) structures at AAV1's  
 19 sialic acid-binding site. Residues that play a role in glycan binding at either binding site are  
 20 indicated for comparison. Electron-density map contoured at  $1\sigma$  (gray mesh) and fitted model  
 21 residues with identities indicated for HVR-IV of the (C) AAV1-PHP.B, (D) AAV1, (E) AAV9-  
 22 PHP.B, and (F) AAV9 capsids. Electron density maps in (C-E), were obtained from cryo-EM  
 23 reconstructions, and in (F) from the 2Fo-Fc X-Ray electron density map. All figures were  
 24 generated using PyMol.

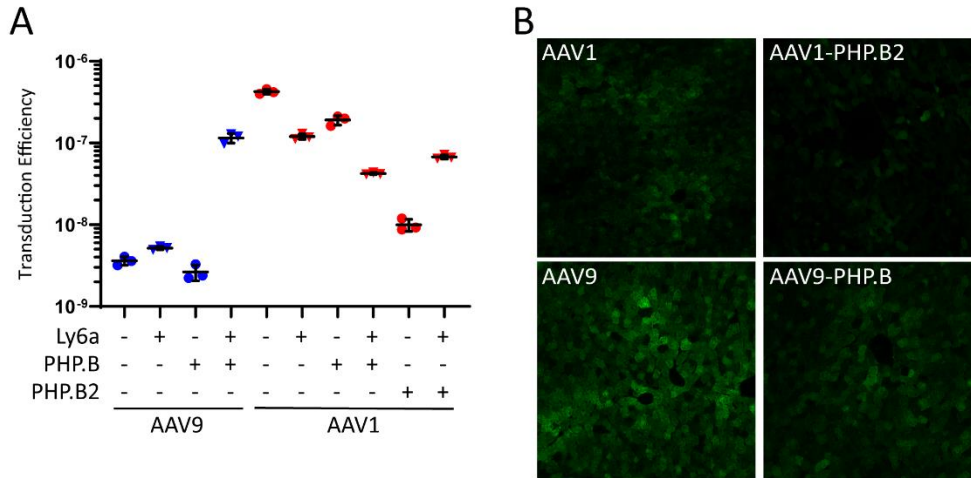

31 **Supplemental Figure 2. Performance of AAV9-PHP.B and AAV1-PHP.B Vectors in Cell**  
 32 **Lines and Ly6a(-) Tissues.** (A) Transduction efficiency of AAV9-PHP.B and AAV1-PHP.B  
 33 variants shown without normalization to cell type or wild-type capsid. This format highlights the  
 34 inherent differences in transduction efficiency between AAV9 and AAV1-based capsids in  
 35 HEK-293 cells. Horizontal bars represent group averages; SDs are reported as error bars; n=3.  
 36 (B) AAV1-PHP.B2 and control vectors packaging a CB7-eGFP reporter gene were administered  
 37 intravenously to C57BL/6J mice at a dose of  $3 \times 10^{11}$  GC per mouse. All vectors show  
 38 widespread transduction of Ly6a(-) murine hepatocytes.
